# Supplementary material
Source: HighWire-hosted journal article supplement (https://cmajopen-stage.highwire.org/highwire/filestream/88212/field_highwire_adjunct_files/0/open-2021-0180-1-at.pdf)
Supplement: open-2021-0180-1-at.pdf [file open-2021-0180-1-at.pdf]

Participant Unique Code Number: \_\_\_\_\_ (do not use a personal identifier)

## **Appendix 1: Data Collection/Capture Sheet**

**(To be used with Master List)**

**Protocol Title:** “Bartonella quintana, "trench fever", in Manitoba: epidemiology, risk factors, clinical manifestations and vector surveillance”

**Principal Investigator:** Dr. Carl Boodman, Room 543 - 745 Bannatyne Avenue, University of Manitoba, Winnipeg, Manitoba R3E 0J9, Canada, 431-374-4187

**Co-Investigator:** Dr. Yoav Keynan, Room 543 - 745 Bannatyne Avenue, University of Manitoba, Winnipeg, Manitoba R3E 0J9, Canada, 204 977-5609

Data to be collected on paper: No

Data to be entered directly into computer spread sheet Yes

### **Data Elements to be collected:**

#### **Demographic data and identifiers**

**Age:** \_\_\_\_\_

**Gender (as described on medical chart):** \_\_\_\_\_

**Geography/ Area: based on first three digits of postal code as listed in medical records:** \_\_\_\_\_

#### **Clinical data elements from chart or database:**

Comorbidities:

Pre-existing valvular disease:

Substance use (as documented in chart at time of *Bartonella* testing):

Housing (description at time of *Bartonella* testing and any description of previous homelessness, use of shelter resources and lack of running water):

Clinical presentation:

Clinical presentation: endocarditis, embolization or mycotic aneurysm:

- Endocarditis: any description in the medical chart and/or imaging (eg:echocardiography), if positive and available, include vegetation size:
- any description of emboli (eg: pulmonary, brain or splenic emboli) in the medical chart or on imaging (eg: CT):

Antimicrobial therapy and duration:

Participant Unique Code Number: \_\_\_\_\_ (do not use a personal identifier)

Surgical therapy, if applicable:

Animal exposures:

Clinical outcome (if survival, indicate time of follow-up, if present).

**Laboratory data:**

Bartonella serology titer: IgG/IGM (separate *B. henselae* and *B. quintana*, if applicable)

16 s Bartonella speciation (if available):

Data collected by (printed name and signature): \_\_\_\_\_

Date Data collected: \_\_\_\_\_
